# Supplementary material
Source: publisher figshare collection journal article supplement (https://acs.figshare.com/ndownloader/files/4583107)
Supplement: Supplementary file 1 [file 4583107]

Supporting Information for

## Formation of Aqueous Suspensions of C<sub>60</sub>, C<sub>70</sub>, and PCBM

Xin Ma\* and Dermont Bouchard

US Environmental Protection Agency, National Exposure Research Laboratory,  
Athens GA, 30605, USA

\* Corresponding author phone: (706) 355-8330; fax: (706) 355-8160; email: ma.cissy@epa.gov

**Figure S1. Structure and molecular formula of PCBM**

**Figure S2. Variation of C<sub>70</sub> particle size,  $\zeta$  potential, and mass over time**

**Figure S3. Representative TEM and AFM images of fullerene aggregates.**

**Figure S4. Colors of all the fullerene suspensions at the end of the experiment.**

*Environmental Science and Technology*

Received July 7, 2008.

Total pages: 5

Figures: 4

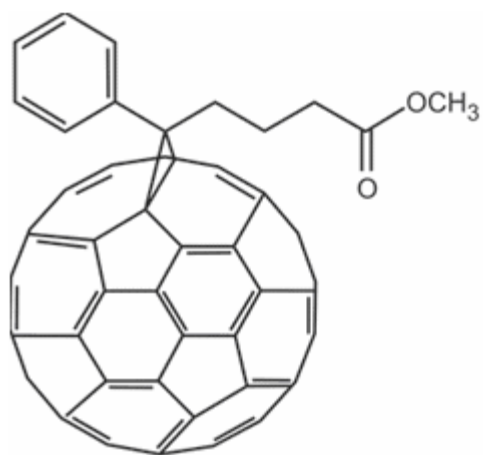

**Figure S1.** The structure of [6,6]-Phenyl C<sub>61</sub> butyric acid methyl ester (PCBM). Molecular formula: C<sub>72</sub>H<sub>14</sub>O<sub>2</sub>.

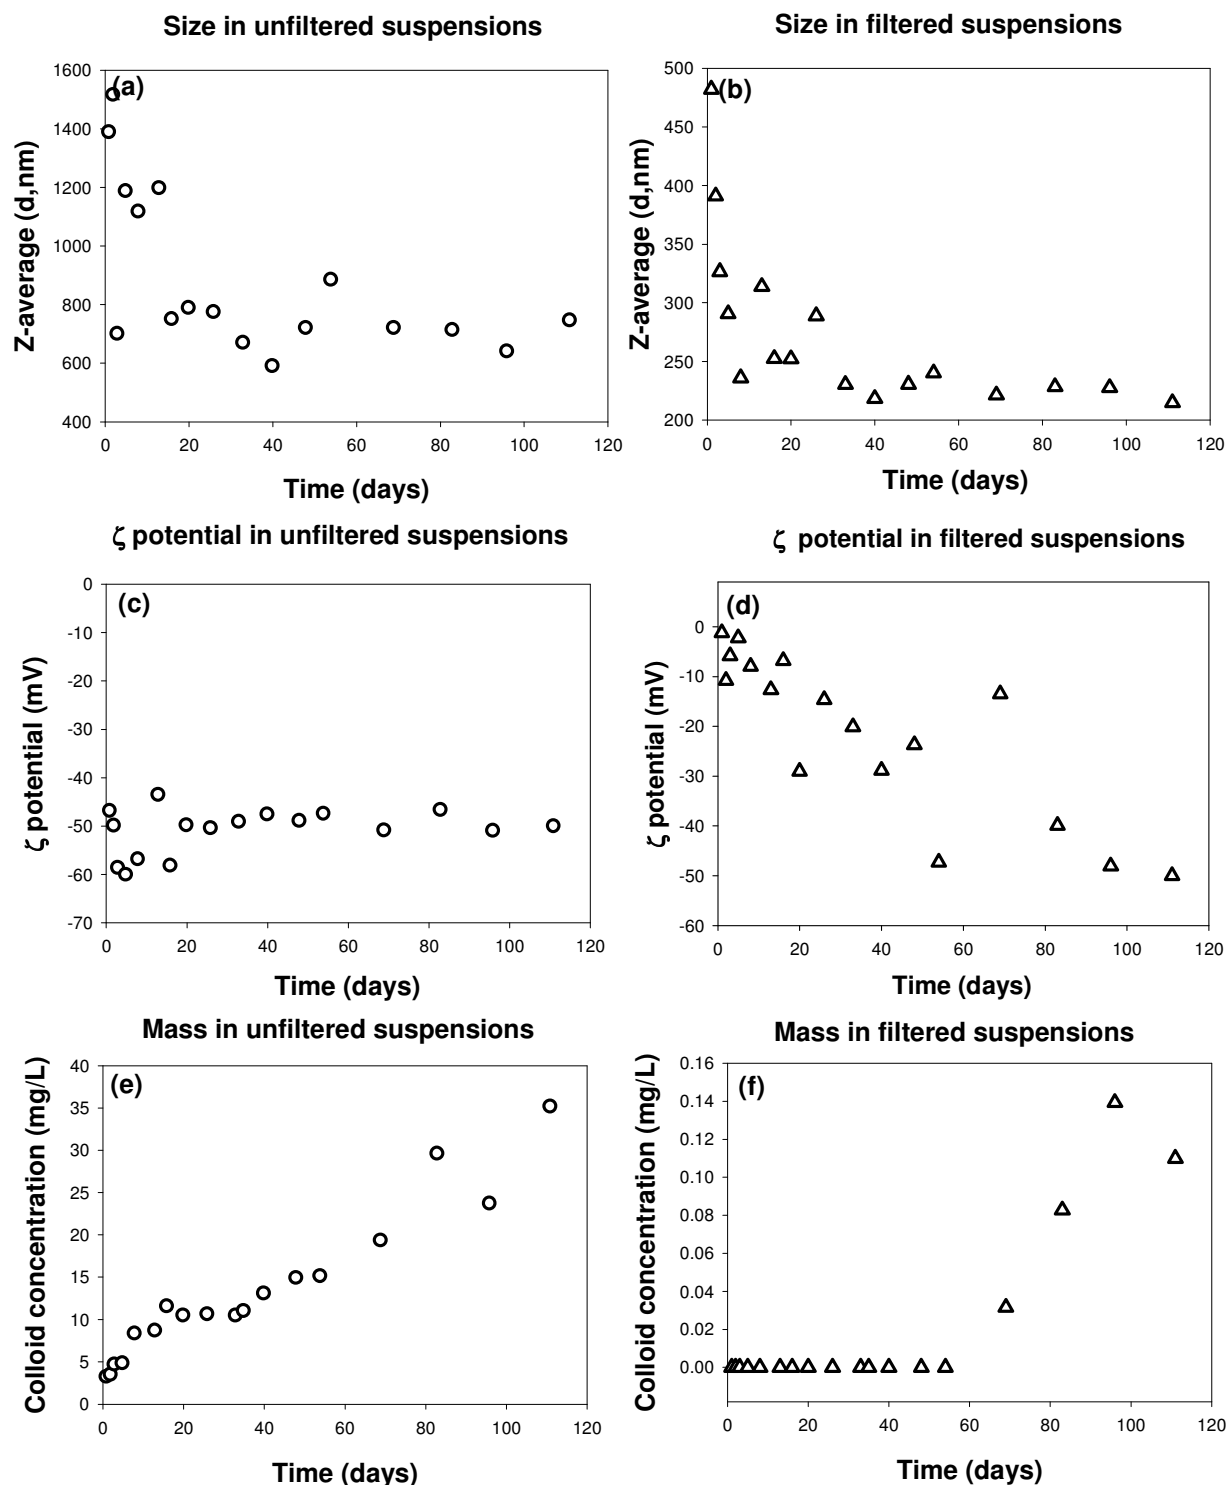

**Figure S2.** Variation of particle size (a) (b),  $\zeta$  potential (c) (d) and mass (e) (f) of aqu/C<sub>70</sub> in unfiltered (○) (a) (c) (e) and filtered (△)(b) (d) (f) samples during 111-day extended stirring. The treatment was C<sub>70</sub> in DDI. The measurement temperature was set at 25 °C.

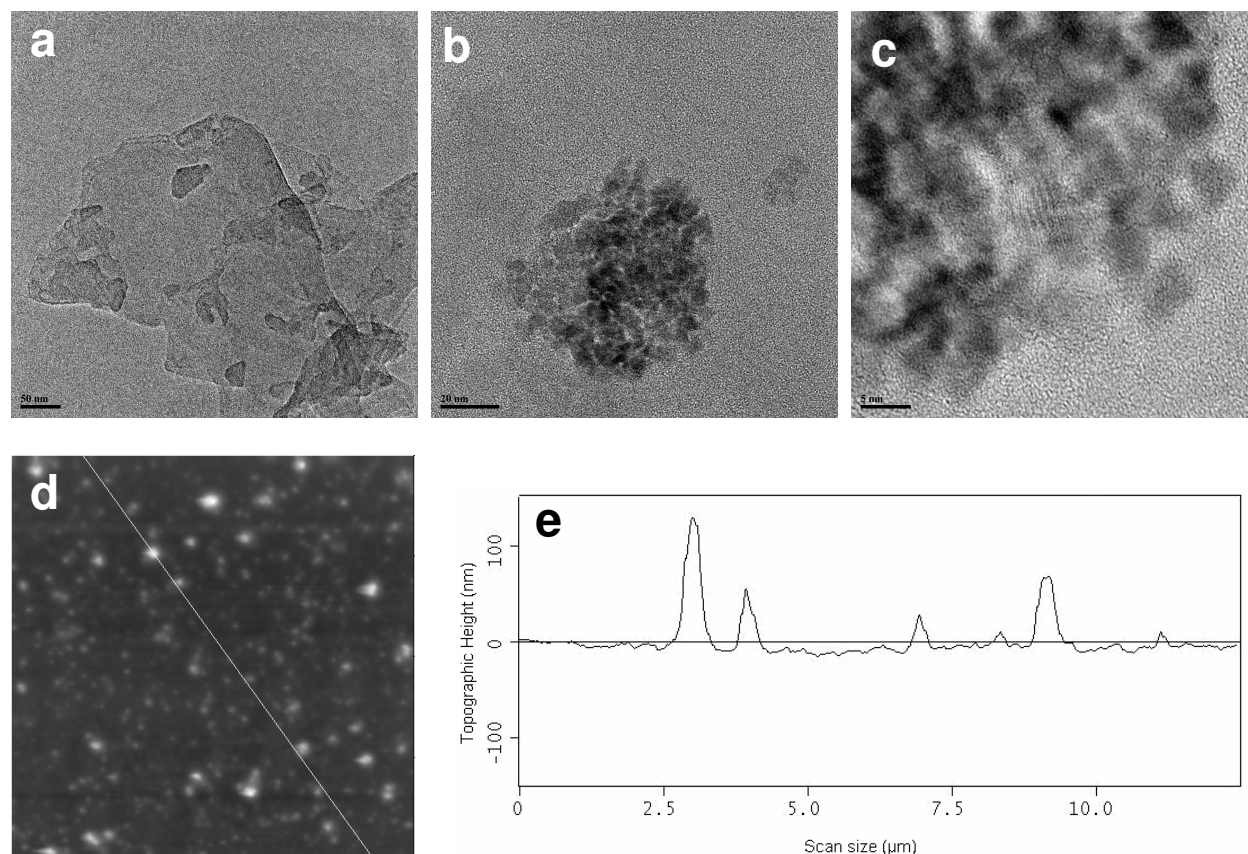

**Figure S3.** Representative TEM and AFM images of fullerene aggregates. (a) Overview TEM image of unfiltered C<sub>60</sub> in DDI showing heterogeneity in size and irregular morphology. Sonicated fullerene suspensions were dropped onto 300 mesh Formvar coated copper grids. All images were high resolution TEM images acquired at 300 kV on a Hitachi-9500 and taken by a 2K Gatan CCD camera with the exposure time of 1s. (b) TEM image of an aggregate cluster of filtered C<sub>60</sub> in DDI. (c) close-up TEM image of a cluster of filtered C<sub>60</sub> in DDI. (d) AFM image of aggregates of filtered C<sub>60</sub> in pH 4 showing polydispersity. AFM imaging was performed in air using a Multimode Nanoscope IIIa (Digital Instrument/Veeco Metrology Group) operated in tapping mode. Etched silicon probes with a nominal spring constant of 50 N/m were used for all images. Image analysis and data processing was performed with Veeco software. The scan size is 10 μm. (e) AFM topographic heights of a section.



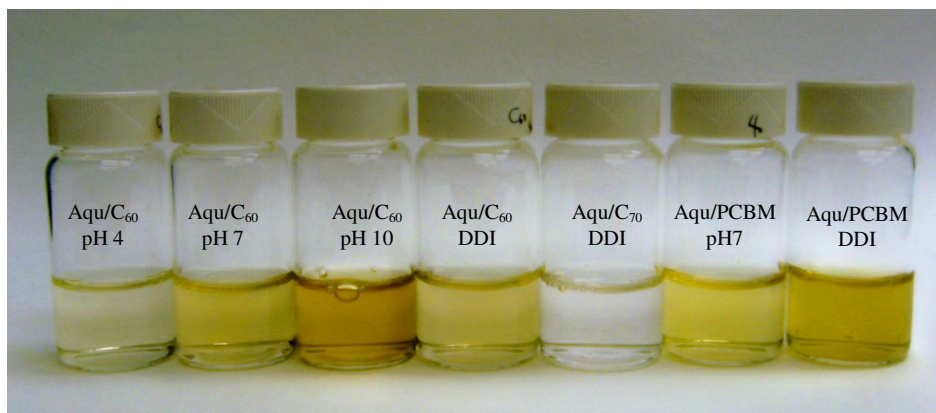

**Figure S4.** Colors of all the fullerene suspensions at the end of the experiment. It indicated the effect of solution chemistry on the formation of aqueous suspensions. All samples were filtered through a 0.45  $\mu$ m filter. From left to right: aqu/C<sub>60</sub> at pH 4; aqu/C<sub>60</sub> at pH 7; aqu/C<sub>60</sub> at pH 10; aqu/C<sub>60</sub> in DDI; aqu/C<sub>70</sub> in DDI; aqu/PCBM at pH 7; and aqu/PCBM in DDI.
